# Supplementary material
Source: HighWire-hosted journal article supplement (https://ez-admanager.com/highwire/filestream/136824/field_highwire_adjunct_files/0/sonderen_1449.pdf)
Supplement: sonderen_1449.pdf [file sonderen_1449.pdf]

# Encefalitis anti LGI1

## Síndrome clínico y seguimiento a largo plazo

Agnes van Sonderen,  
MD  
Roland D. Thijs, MD,  
PhD  
Elias C. Coenders, BSc  
Lize C. Jiskoot, MSc  
Esther Sanchez, MD  
Marienke A.A.M. de  
Bruijn, MD  
Marleen H. van  
Coevorden-  
Hameete, MD  
Paul W. Wirtz, MD, PhD  
Marco W.J. Schreurs,  
PhD  
Peter A.E. Sillevs Smitt,  
MD, PhD  
Maarten J. Titulaer, MD,  
PhD

Correspondencia y solicitud de  
separatas al Dr Titulaer:  
m.titulaer@erasmusmc.nl

### RESUMEN

**Objetivo:** Este estudio a nivel nacional ofrece una descripción detallada de las características clínicas y la evolución a largo plazo de la encefalitis por anticuerpos *anti-leucine-rich glioma-inactivated 1* (LGI1).

**Métodos:** Se incluyeron pacientes prospectivamente a partir de octubre de 2013, y retrospectivamente a partir de muestras enviadas a nuestro laboratorio a partir de enero de 2007. Se confirmaron los anticuerpos LGI1 tanto por ensayos basados en células como por inmunohistoquímica. La información clínica se obtuvo de entrevistas con pacientes y sus familiares y de los registros médicos. La RM inicial y la resonancia magnética de seguimiento fueron revisadas a ciegas. Se realizó evaluación neuro-psicológica en aquellos pacientes con seguimiento mayor a 2 años.

**Resultados:** La incidencia anual en los Países Bajos fue de 0,83/millón. Un total de 34/38 pacientes tuvieron una encefalitis límbica. Convulsiones focales sutiles (66%, autonómica o discognitiva) y convulsiones distónicas facio-braquiales (FBDS, 47%) ocurrieron sobre todo antes del inicio de la alteración de la memoria. Más tarde, durante el curso evolutivo, el 63% tuvieron crisis tónico clónicas. La RM inicial mostró hiperintensidad en T2 en hipocampos en el 74% de los pacientes. Estas lesiones evolucionaron mayoritariamente a esclerosis temporal mesial (44%). Una respuesta sustancial a la inmunoterapia se observó en el 80%, con respuesta temprana de las convulsiones y lenta recuperación de la cognición. En el seguimiento de  $\geq 2$  años, la mayoría de los pacientes que sobrevivieron reportaron déficit cognitivo residual leve con desorientación espacial. Un total de 86% presentó amnesia persistente del período de la enfermedad. Las recidivas fueron frecuentes (35%) y se presentaron hasta 8 años después de la enfermedad. La tasa de letalidad a dos años fue del 19%.

**Conclusiones:** La encefalitis anti-LGI1 es un síndrome clínico homogéneo, manifestado de forma precoz por FBDS y otras convulsiones focales con manifestaciones clínicas sutiles, seguidas de alteraciones de la memoria. Un mejor reconocimiento conducirá a un diagnóstico precoz, esencial para el inicio rápido del tratamiento. La evolución a largo plazo de los pacientes supervivientes es en su mayoría favorable, pero las recaídas son comunes. *Neurology*® 2016;87:1449-1456

### GLOSARIO

**AMPA** = receptor  $\alpha$  amino-3-hidroxi-5-metil-4-isoxazolepropiónico; **DLP** = depresión a largo plazo; **EL** = encefalitis límbica; **EMH** = esclerosis mesial del hipocampo; **ERm** = Escala de Rankin modificada; **ESE** = *Epworth Sleepiness Scale* (Escala de somnolencia de Epworth); **FBDS** = *faciobrachial dystonic seizures* (convulsiones distónicas facio-braquiales); **IC** = intervalo de confianza; **IED** = Intradimensional-extradimensional; **ICSP** = Índice de calidad de sueño de Pittsburgh; **LGI1** = *leucine-rich glioma-inactivated 1*; **MRE** = memoria de reconocimiento espacial; **NMDAR** = receptor NMDA; **PLP** = potenciación a largo plazo; **RIC** = rango intercuartílico; **VGKC** = *voltage-gated potassium channels* (canales de potasio dependiente de voltaje).

En 2010 se descubrieron los anticuerpos dirigidos contra *leucine-rich glioma-inactivated 1* (LGI1).<sup>1,2</sup> Antes de eso, se pensaba que los pacientes tenían anticuerpos contra los canales de potasio dependientes de voltaje (VGKC), a la que la proteína LGI1 está funcionalmente relacionada. La mayoría de los pacientes con anti-LGI1 se presentan con encefalitis límbica (EL). La EL se caracteriza clínicamente por una perturbación subaguda de la memoria y el comportamiento, a menudo acompañada de convulsiones. Los pacientes tienden a mejorar con la inmunoterapia, pero el pronóstico a largo plazo es malo.

LGI1 se expresa principalmente en el hipocampo y la corteza temporal, donde se secreta en el espacio sináptico. Es parte de una vía inhibitoria que une el VGKC presináptico y el receptor del ácido  $\alpha$ -amino-3-hidroxi-5-metil-4-isoxazol-propiónico postsináptico (AMPA)<sup>3,4</sup>. La alteración genética de la proteína LGI1 causa la epilepsia temporal lateral autosómica dominante.<sup>5,6</sup>

De los Departments of Neurology (A.v.S., M.A.A.M.d.B., P.A.E.S.S., M.J.T., M.H.v.C.-H.), Neuropsychology (E.C.C., L.C.J.), and Immunology (M.W.J.S.), Erasmus Medical Center, Rotterdam; Department of Neurology (A.v.S., P.W.W.), Haga Teaching Hospital, the Hague; Stichting Epilepsie Instellingen Nederland (SEIN) (R.D.T.), Heemstede; Department of Radiology and Nuclear Medicine (E.S.), VU University Medical Center, Amsterdam; and Department of Biology (M.H.v.C.-H.), Division of Cell Biology, Utrecht University, the Netherlands.  
Visite [Neurology.org](http://Neurology.org) para obtener información completa. Información de financiamiento y revelaciones consideradas relevantes por los autores, en su caso, se proporcionan al final del artículo.

Las convulsiones son comunes también en pacientes con LGI1, enfermedad mediada por anticuerpos. Las convulsiones distónicas facio-braquiales (FBDS) son muy específicas para la encefalitis anti-LGI1, aunque solo están presentes en una minoría de los pacientes.<sup>7</sup> FBDS son contracciones involuntarias de 1-2 segundos, que afectan el brazo (o pierna) unilateral y la cara, ocurren hasta 100 veces al día, pero a menudo no son reconocidas por los pacientes ni los médicos.

Aproximadamente 250 pacientes con anti-LGI1 han sido reportados, descritos en su mayor parte como encefalitis por VGKC. Debido a un mejor reconocimiento, se espera que su incidencia aumente drásticamente, pero los datos sobre incidencia son escasos. Este estudio a nivel nacional brinda la oportunidad de reportar tasas de incidencia. Describimos el curso de la enfermedad en detalle, y proporcionamos datos para mejorar el reconocimiento y evitar fallas de laboratorio. Reportamos la evolución a largo plazo, incluso las evaluaciones neuropsicológicas y las tasas de recaída.

**MÉTODOS Reclutamiento de pacientes y pruebas de laboratorio.** Las muestras fueron enviadas para la prueba de anticuerpos al Laboratorio de Inmunología del Centro Médico Universitario Erasmus, Rotterdam. Este es el único laboratorio que realiza el análisis de anticuerpos LGI1 en los Países Bajos y, por lo tanto, tenemos una cobertura nacional. Se incluyeron pacientes con anticuerpos LGI1 confirmados independientemente de la edad o del síndrome clínico. Pacientes diagnosticados entre 2007 y octubre de 2013 se incluyeron retrospectivamente y se les invitó a completar la evaluación neuropsicológica para analizar su status cognitivo a largo plazo. Los pacientes diagnosticados entre octubre 2013 y octubre de 2015 fueron evaluados prospectivamente.

Los anticuerpos LGI1 se detectaron tanto con el ensayo basado en células como mediante inmunohistoquímica en suero (y en LCR si estaba disponible) tal como se describió previamente<sup>8</sup>, también detallado *online* (e-apéndice y la figura e-1 en *Neurology.org*).

La tasa de incidencia se basó en el número de pacientes diagnosticados en los Países Bajos en los últimos 12 meses (octubre de 2014 a septiembre 2015), y comparado con el período de 3 años anterior al inicio del estudio (octubre de 2010 a septiembre de 2013).

**Información clínica.** La información clínica se obtuvo en una consulta con pacientes y familiares (si era posible) durante una visita a nuestra clínica (n = 21) o por teléfono (n = 17), y de los registros

clínicos y entrevistas telefónicas con los médicos tratantes.

Las convulsiones fueron clasificadas por un epileptólogo experimentado (R.D.T.), basado en entrevistas, archivos y reportes de EEG. FBDS fueron definidas como convulsiones frecuentes (> 8/día) con una postura distónica del brazo, a menudo acompañada de una contracción facial, que dura menos de 30 segundos.<sup>9</sup> Los disturbios del sueño se evaluaron con la escala de somnolencia de Epworth (ESE) para somnolencia diurna y el índice de calidad de sueño de Pittsburgh (ICSP) para la calidad del sueño y las alteraciones. Se consideró que los pacientes respondían al tratamiento si mostraban una mejora clínica sustancial dentro de las 4 semanas del inicio del tratamiento, según el criterio del médico tratante.

Las RM de cerebro realizadas durante y después de la enfermedad fueron reevaluadas por un neurorradiólogo experimentado independiente (E.S.), mezcladas con RM de control para su enmascaramiento. Se realizó la evaluación visual del volumen del hipocampo y los cambios en las secuencias de recuperación de la inversión atenuada de fluidos (FLAIR) y señal ponderadas en T2 de los hipocampos. La evaluación se realizó en el plano coronal al nivel del hipocampo (o plano axial si las imágenes coronales estaban ausentes).

La evolución cognitiva a largo plazo se analizó en pacientes con inicio de enfermedad de más de 2 años. Se realizó evaluación neuropsicológica utilizando la batería automatizada de test neuropsicológicos de Cambridge (CANTAB Research Suite 6.0, Cambridge Cognition Ltd., Cambridge, Reino Unido). Se presumía que los déficits residuales más relevantes se encontrarían en los dominios de memoria, orientación espacial y funcionamiento ejecutivo. Por lo tanto, nuestros resultados primarios fueron memoria de reconocimiento espacial (MRE) y la variación de conjunto intradimensional-extradimensional (IED, total de los errores). Se agregaron siete pruebas de diferentes dominios cognitivos para una exploración más amplia de la evolución cognitiva (tabla e-1).

**Aprobaciones de protocolos estándar, registros y consentimientos de pacientes.** El estudio fue aprobado por el Comité de Revisión Institucional del Centro Médico Universitario Erasmus, Rotterdam. El consentimiento informado se obtuvo en todos los pacientes.

**Análisis estadístico.** La tasa de incidencia se calculó con el 95% de intervalo de confianza (IC) basada en una distribución de Poisson, utilizando los datos poblacionales disponibles ([statline.cbs.nl/statweb/](http://statline.cbs.nl/statweb/)). Los datos categóricos fueron analizados con el test exacto de Fisher-Freeman, los datos numéricos con la prueba *U* de Mann-Whitney y la correlación con Spearman rho, con valores de  $p < 0,05$  considerados significativos. Los resultados de CANTAB se expresaron como puntuaciones *z*, basadas en datos normativos (por edad y sexo) obte-

**Tabla 1** Características de los pacientes (n = 38)

| Características                                        | Valores                              |
|--------------------------------------------------------|--------------------------------------|
| Varones, n (%)                                         | 25/38 (66)                           |
| Edad de inicio, en años, media (RIC rango)             | 64 (60–69, 31–84)                    |
| Tiempo hasta la severidad máxima, semanas (RIC, rango) | 22 (8–32, 2–150)                     |
| <b>Síndrome clínico, n (%)</b>                         |                                      |
| Encefalitis límbica                                    | 34 (90)                              |
| Síndrome de Morvan <sup>a</sup>                        | 3 (8)                                |
| Epilepsia                                              | 1 (3)                                |
| Convulsiones, n (%)                                    | 34 (90)                              |
| Déficit de memoria, n (%)                              | 37 (97)                              |
| Desorden de comportamiento, n (%)                      | 34 (90)                              |
| Desorientación espacial n (%)                          | 17/33 (52)                           |
| Insomnio, n (%)                                        | 20/31 (65)                           |
| Pérdida de peso, n (%)                                 | 9/33 (27)                            |
| Disfunción autonómica, n (%)                           | 15/32 (47)                           |
| Dolor, n (%)                                           | 3/34 (9)                             |
| Síntomas del sistema nervioso periférico, n (%)        | 5/32 (16)                            |
| Hiponatremia, n (%)                                    | 24/37 (65)                           |
| <b>LCR, n (%)</b>                                      |                                      |
| Recuento de células > 5 células/ $\mu$ L               | -5/32 (16) (máx 88 células/ $\mu$ L) |
| Proteínas > 0,58 g/L                                   | -5/32 (16)                           |
| <b>EEG, n (%)</b>                                      |                                      |
| Enlentecimiento focal                                  | -9/36 (25)                           |
| Epiléptico                                             | -11/36 (31)                          |
| <b>RM en el debut, n(%)</b>                            |                                      |
| Lesión hipocampal unilateral                           | -21/35 (60)                          |
| Lesión hipocampal bilateral                            | -5/35 (14)                           |
| Normal                                                 | -9/35 (26)                           |
| <b>RM en el seguimiento, n(%)</b>                      |                                      |
| Esclerosis mesial temporal                             | -7/17 (41)                           |
| Hiperintensidad T2 hipocampal                          | -6/17 (35)                           |
| Normal                                                 | -4/17 (24)                           |
| Tumor                                                  | 4/36 (11)                            |
| VGKC RIA media (RIC, rango)                            | 720 (457–971, 245–1,314)             |
| Ensayo LGI1 basado en células, LCR, n (%) <sup>b</sup> | 38/38 (100); 9/17 (53)               |
| Inmunohistoquímica LGI1, suero; LCR, n(%) <sup>c</sup> | 38/38 (100); 15/17 (88) <sup>d</sup> |

Abreviaturas: LGI1 = *leucine-rich glioma-inactivated 1*, RIA = radioinmunoensayo, RIC = Rango intercuartilo, VGKC = canales de potasio dependientes de voltaje.

<sup>a</sup> Síndrome de Morvan fue definido como una encefalitis límbica con hiperexcitabilidad de nervios periféricos, trastornos del sueño o disautonomía.

<sup>b</sup>  $p = 0,008$ , McNemar Test comparando suero con LCR

<sup>c</sup>  $p = 0,50$ , McNemar Test comparando suero con LCR.

<sup>d</sup> Ambas muestras registradas negativas fueron negativas también en ensayos basados en células.

nidos por la empresa y analizadas con pruebas  $t$  de una muestra (valor de prueba = 0). Mediciones del resultado primario (SRM e IED) se consideraron significativas si  $p < 0,025$  (Bonferroni). Las medidas de resultado secundarias fueron exploratorias, sin corrección para pruebas múltiples. Estos valores  $p$  deben ser interpretados cuidadosamente. Para el análisis se utilizó el programa SPSS Statistics 21 (IBM Corp., Armonk, NY).

**RESULTADOS** Treinta y nueve pacientes con anti-LGI1 fueron identificados, 38 de los cuales se encontraban disponibles para su inclusión (19

prospectivamente; tabla 1). Veinticinco pacientes eran varones (66%). La edad media de inicio de la enfermedad fue de 64 años. El seguimiento promedio fue de 27 meses. La evolución a largo plazo fue analizada en 21 pacientes con seguimiento  $\geq 2$  años.

**Incidencia.** Catorce pacientes fueron diagnosticados clínicamente con encefalitis anti-LGI1 en el último año, resultando en una incidencia anual de 0,83/millón (IC del 95% 0,45-1,40), lo que representa un incremento en comparación con solo 11 pacientes diagnosticados en el período de 3 años anteriores (incidencia anual 0,22/millón; IC del 95%: 0,11 -0,39;  $p = 0,002$ ).

**Fenotipo clínico.** Treinta y cuatro pacientes tenían encefalitis límbica, 3 pacientes tenían síndrome de Morvan (encefalitis límbica, hiperexcitabilidad de nervios periféricos e insomnio/disautonomía) y 1 paciente tuvo solo convulsiones. Los síntomas iniciales más comunes fueron las convulsiones (53%) o trastorno cognitivo (42%; figura 1A). El curso evolutivo típico de la enfermedad se muestra en la figura 1B. La media del tiempo entre el inicio de la enfermedad y el nadir fue de 22 semanas. En el momento de severidad máxima de la enfermedad, el 76% había alterado la escala de Rankin modificada (ERm) a una puntuación  $\geq 3$ . Casi todos los pacientes evolucionaron con disturbios de memoria (97%) o comportamiento (90%). Los cambios de comportamiento incluían la apatía (53%), la desinhibición (comer excesivamente, pérdida de habilidades sociales, 40%), egocentrismo (38%) o comportamiento compulsivo (limpieza, acaparamiento, 29%). Más de la mitad de los pacientes tenían desorientación espacial, a menudo reportado como perderse caminando al supermercado o en la sala.

Durante el curso de la enfermedad, 33 pacientes (89%) desarrollaron uno o más tipos de convulsiones (tabla 2 y descripciones de casos electrónicos). Las FBDS (47%) comenzaron en su mayoría varias semanas antes del inicio de los síntomas cognitivos. La frecuencia media fue de 40 FBDS por día. Las crisis focales con características predominantemente discognitivas ( $n = 15$ ), autonómicas ( $n = 9$ ), motoras ( $n = 3$ ) o gelásticas ( $n = 2$ ) o aura ( $n = 1$ ) estuvieron presentes en 25 pacientes (66%). Las convulsiones focales duraron más tiempo que las FBDS y la frecuencia media fue de 12 por día. Convulsiones tónico-clónicas ocurrieron en el 63% de los pacientes, en su mayoría simultáneamente con el inicio del deterioro cognitivo o después de este. La mayoría de los pacientes tuvo solo una o unas pocas convulsiones tónico-clónicas. Este último tipo de crisis fue a menudo

**Figura 1** Síntomas de presentación y evolución de la enfermedad

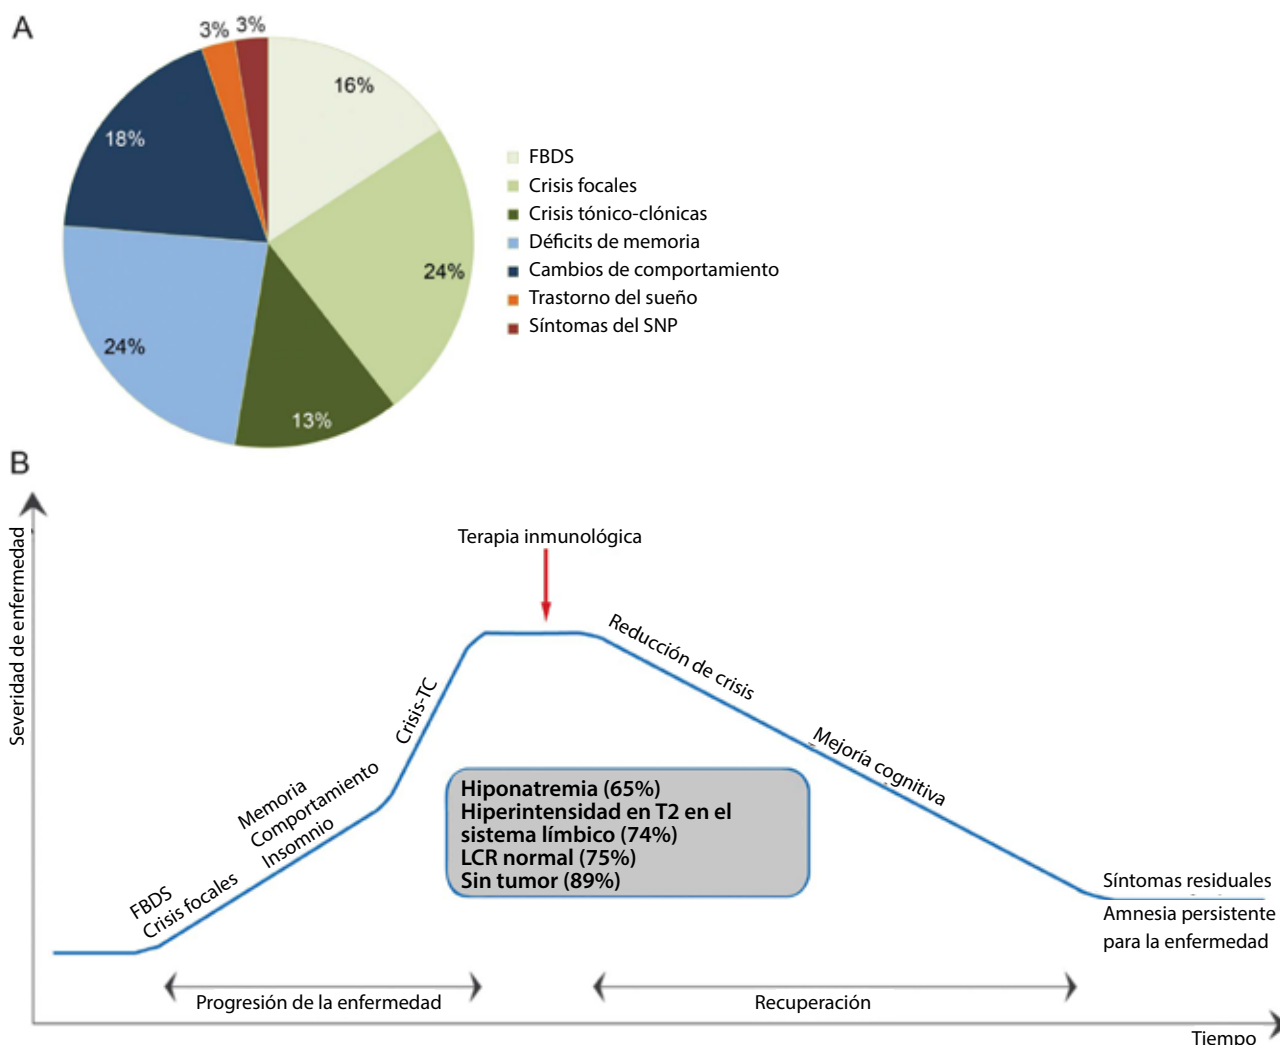

(A) Primer síntoma en 38 pacientes con encefalitis *anti-leucine-rich glioma-inactivated 1* (LGI1). (B) Evolución de la enfermedad en la encefalitis anti-LGI1. Línea de tiempo: mediana de la progresión de la enfermedad 22 semanas, mediana del retraso en el tratamiento 25 semanas, mediana del comienzo de la mejoría 2 semanas después del tratamiento, mediana del tiempo de recuperación 33 semanas. FBDS = crisis distónicas faciobraquiales (*faciobrachial dystonic seizures*); SNP = sistema nervioso periférico; crisis; TC = crisis tónico-clónica.

el desencadenante para iniciar o ampliar las pruebas auxiliares.

Otros síntomas comunes fueron insomnio (65%) y disfunción autonómica (47%, principalmente hiperhidrosis). La disfunción sexual no fue sistemáticamente interrogada, pero 5 pacientes varones (21%) la informaron espontáneamente. Un paciente tuvo marcada corea. Un paciente desarrolló síntomas bulbares de

miastenia gravis, concomitante con el inicio de la encefalitis límbica (ACRA positivos, no timoma).

**Análisis complementarios.** En la fase sintomática aguda, la hiponatremia se encontró en el 65% de los pacientes. El recuento celular y proteico en el LCR fue normal en el 75%. Una RM cerebral inicial estuvo disponible para su revisión en

**Tabla 2** Características de crisis epilépticas en 38 pacientes

|                                               | FBDS                                      | Crisis focales (otra que no sea FBDS)                  | Crisis tónico clónicas                                     |
|-----------------------------------------------|-------------------------------------------|--------------------------------------------------------|------------------------------------------------------------|
| Num. pacientes (%)                            | 18 (47)                                   | 25 (66)                                                | 24 (63)                                                    |
| Duración de crisis, seg.                      | Menor 15                                  | Media 25 (rango 1-600)                                 |                                                            |
| Frecuencia de crisis                          | Media: 40/día, rango 10-100/día RIC:20-80 | Media: 12/día, rango 1-150/día RIC:3-40                | Media: 3 en total, rango 1-100 en total, RIC 1-5           |
| Relación con el inicio de síntomas cognitivos | Antes (67%), media 3 semanas antes        | Antes o simultáneamente (90%), media 1.5 semanas antes | Simultáneamente o después (78%), media 0.5 semanas después |

Abreviaturas: FBDS = crisis convulsivas distónicas faciobraquiales; RIC = rango intercuartílico

35 pacientes (figura e-2A). La media del tiempo transcurrido hasta la primera RM fue de 11 semanas (rango intercuartilo [RIC] 5-24, rango 0-55 semanas). Se observaron lesiones hipocampales en el 74%, 81% de las cuales eran unilaterales. Un 40% presentaba edema del hipocampo con aumento de la intensidad de señal T2. Un total de 14% presentó hiperintensidad en imágenes T2 con volumen normal del hipocampo. Siete (20%) pacientes tuvieron pérdida del volu-

men del hipocampo en RM inicial. Seis de estos 7 pacientes tenían aumento de intensidad de la señal T2, 4 de los cuales cumplían criterios de esclerosis temporal mesial (ETM). El tiempo promedio de inicio fue de 6.5 semanas en pacientes con edema y 18.5 semanas en pacientes con pérdida de volumen del hipocampo ( $p = 0,052$ ). En el 23%, las hiperintensidades se extendieron a la amígdala ( $n = 6$ ), ínsula ( $n = 1$ ) o estriado ( $n = 1$ ).

Se dispusieron de resonancias magnéticas de seguimiento en 19 pacientes (figura e-2B). El tiempo medio para el inicio de los síntomas fue de 27 semanas (rango 7-149 semanas). Un total de 16 pacientes tuvieron lesiones hipocampales en la primera RM, de los cuales 7 pacientes (44%) tuvieron ETM en el seguimiento (3 con ETM en la RM inicial). Un total de 86% de los pacientes con ETM tuvo convulsiones diarias múltiples durante el período de severidad máxima de la enfermedad, en comparación con el 50% sin ETM ( $p = 0,17$ ). Un total de 38% tuvo señal alta persistente sin pérdida de volumen. La RM cerebral se normalizó en los otros 3 pacientes (19%) y 3 pacientes con RM normal inicial mantuvieron una RM normal en el seguimiento.

El EEG mostró descargas epilépticas (31%) o enlentecimiento focal (25%) en la mitad de los pacientes. Un total de 13 pacientes tuvieron manifestaciones clínicas de convulsiones durante los registros de EEG. Las FBDS no tuvieron correlación EEG ( $n = 7$ ), mientras que 16/17 de crisis focales discognitivas, autonómicas, gelásticas o motoras se asociaron con descargas epilépticas.

El análisis tumoral mostró malignidad en 3 pacientes: tumor neuroendocrino del páncreas, timoma con metástasis y mesotelioma abdominal. Un paciente adicional había tenido carcinoma rectal *in situ* detectado 2 meses antes de la aparición de enfermedad neurológica. Un quinto paciente tenía metástasis de cáncer de mama desde hacía 7 años y se excluyó del análisis tumoral.<sup>10</sup> Aunque se desconocía si todos los tumores estaban relacionados, se calculó la incidencia tumoral como 4/36 (11%).

La media del resultado de radioinmunoensayo de VGKC fue de 720 pM, variando de 245 a 1314 pM (positivo > 100 pM). Todos los sueros resultaron positivos para los anticuerpos LGI1 tanto en el ensayo basado en células como en la inmunohistoquímica. El LCR estuvo disponible para las pruebas en 17 pacientes, el 88% de los cuales mostraron una tinción típica de anticuerpo LGI1 en el cerebro de rata. Solo 9/17 muestras de LCR (53%) fueron positivas para LGI1 por CBA.

En ninguno de los pacientes analizados, hubo anticuerpos contra Caspr2 ( $n = 38$ ), receptor NMDA (NMDAR) ( $n = 32$ ) o anticuerpos onconeurales ( $n = 29$ ).

**Figura 2** Evolución en pacientes con seguimiento  $\geq 2$  años ( $n = 21$ )

**A. mRS durante el seguimiento**

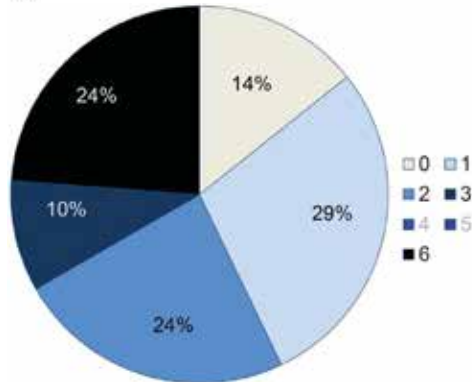

**B. Déficits cognitivos actuales**

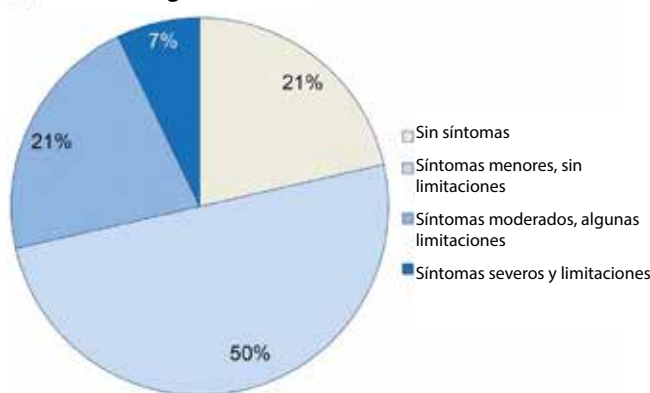

**C. Crisis actuales**

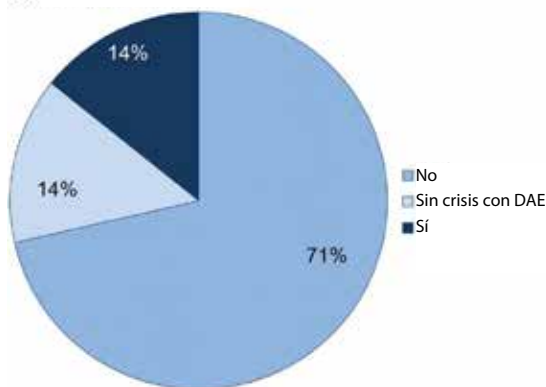

(A) Escala de Rankin modificada (mRS) en el seguimiento. Catorce pacientes (67%) tuvieron una evolución favorable (mRS 0-2). Cinco pacientes murieron (24%), 4 de los cuales murieron en los primeros 2 años (tasa de fatalidad a los 2 años 19%). (B) Déficits cognitivos actuales, solo incluyendo pacientes vivos sin recaída reciente. (C) Crisis en los últimos 12 meses, solo incluyendo pacientes vivos sin recaída reciente. DAE = droga antiepiléptica.

**Tratamiento.** El episodio inicial de la enfermedad se trató con inmunoterapia en 32 pacientes, con un retraso medio de 25 semanas (RIC 9-46, rango 1 semana-2.5 años). Un total de 30 pacientes fueron tratados con corticosteroides (n = 8 oral, IV n = 6 o ambos n = 16), 18 de los cuales fueron tratados adicionalmente con inmunoglobulinas EV o plasmaféresis. Dos pacientes recibieron solo inmunoglobulinas. El tratamiento de primera línea fue considerado eficaz en el 80% de los pacientes. El tiempo promedio para el inicio de la mejoría fue de 2 semanas. La mejoría se dio con la disminución de las convulsiones en el 58% o disminución de las convulsiones simultáneamente con la mejoría cognitiva en el 42%.

Seis pacientes no fueron tratados con inmunoterapia. Tres pacientes, dos diagnosticados retrospectivamente, tuvieron principalmente convulsiones, con síntomas cognitivos menores, habiendo mejorado con los fármacos antiepilépticos. Un cuarto paciente fue inicialmente diagnosticado con crisis parciales complejas, pero cuando desarrolló problemas de conducta se sospechó que tenía una enfermedad psiquiátrica. Ella permaneció sin tratamiento hasta el diagnóstico durante la recaída. Dos pacientes tuvieron encefalitis límbica grave y murieron sin tratamiento y sin diagnóstico.

**Seguimiento a largo plazo.** El seguimiento de más de 2 años estuvo disponible en 21 pacientes. La media de seguimiento fue de 42 meses. Un total de 67% tuvo una evolución favorable (RSm 0-2; figura 2A). Dos pacientes (10%) permanecieron moderadamente afectados (RSm = 3) debido a una recaída. Dos pacientes inicialmente mostraron una recuperación parcial, pero murieron por comorbilidades agravadas por esteroides (lesiones en médula espinal debidas a fracturas torácicas y perforación diverticular) y 3 pacien-

tes fallecieron sin mejoría desde el inicio. La tasa de letalidad a dos años fue del 19%.

En pacientes en recuperación, la media del tiempo entre el comienzo de la mejoría y el final de la recuperación fue de 33 semanas (RIC 18 - 52, rango 13 - 108). El cese de convulsiones fue temprano. En el seguimiento final, el 28% de los pacientes todavía estaban con fármacos antiepilépticos y solo el 14% tuvo convulsiones en el último año (figura 2C). Los síntomas residuales reportados por los pacientes o familiares fueron déficit de memoria, apatía y dificultades con la orientación espacial. Un 86% tuvo amnesia persistente del período de la enfermedad. Estos pacientes no recordaban las internaciones hospitalarias y carecían de recuerdos de acontecimientos de la vida que sucedieron durante la enfermedad. Amnesia retrógrada también fue informada, a menudo expresada como falta de recuerdos de vacaciones. Tres pacientes (21%) refirieron insomnio persistente, con trastorno del sueño confirmado con ICSP > 5. Ningún paciente tuvo una ESE aumentada que indicara somnolencia diurna. En general, la media del tiempo desde la aparición de los síntomas hasta la recuperación máxima fue de 67 semanas (RIC 50-115, rango 36-269 semanas). No hubo relación entre el retraso del tratamiento y el tiempo hasta la mejoría máxima o el RSm final ( $p = 0,76$  y  $p = 0,86$ , respectivamente).

Quince pacientes eran candidatos para realizar una evaluación neuropsicológica (seguimiento de  $\geq 2$  años), 12 de los cuales acordaron participar. La evaluación se realizó después de una media de seguimiento de 44 meses (rango 25-95). Problemas conductuales residuales impidieron una evaluación fiable en un paciente (RSm = 3), permitiendo el análisis de solo 11 pacientes, todos con un RSm 0-2. Resultados de

**Tabla 3** Resultados de las evaluaciones neurocognitivas realizadas con la batería de test neuropsicológicos automatizados de Cambridge

| Test                                              | Resultado medido                        | No. | Z score (promedio, DS) | Valor de p         | 95% IC        |
|---------------------------------------------------|-----------------------------------------|-----|------------------------|--------------------|---------------|
| <b>Memoria verbal</b>                             |                                         |     |                        |                    |               |
| Prueba de denominación clasificada                | Porcentaje correcto                     | 11  | 0,21(0,65)             | 0,3                | -0,22 to 0,65 |
| <b>Memoria visual</b>                             |                                         |     |                        |                    |               |
| Retraso de coincidencia con la muestra            | Porcentaje correcto (todas las demoras) | 10  | 0,07 (0,64)            | 0,75               | -0,39 a 0,53  |
| Patrón de reconocimiento de memoria               | Porcentaje correcto                     | 11  | 0,06 (0,98)            | 0,85               | -0,39 a 0,53  |
| Memoria de reconocimiento espacial                | Porcentaje correcto                     | 11  | -1,06 (1,24)           | 0,018 <sup>a</sup> | -1,89 a -0,23 |
| <b>Función ejecutiva</b>                          |                                         |     |                        |                    |               |
| Desplazamiento dimensional intra-extradimensional | Total de errores                        | 11  | 0,25 (0,68)            | 0,25               | -0,21 a 0,70  |
| Memoria de trabajo espacial                       | Entre errores                           | 11  | 0,36(1,14)             | 0,32               | -0,40 a 1,13  |
| Span visuoespacial                                | Largo del span                          | 11  | -0,46 (1,72)           | 0,4                | -1,61 a 0,70  |
| <b>Atención</b>                                   |                                         |     |                        |                    |               |
| Coincidencia con la muestra                       | Porcentaje correcto                     | 11  | -0,67(0,95)            | 0,041 <sup>b</sup> | -1,31 a -0,03 |
| Tiempo de reacción                                | Tiempo promedio de reacción simple      | 10  | -0,48(1,54)            | 0,36               | -1,58 a 0,63  |

Abreviaturas: IC= Intervalo de confianza.

Las pruebas cursivas fueron definidas de antemano como medidas de resultado primario

<sup>a</sup>  $p < 0,025$  (valor de corte para medidas de resultado primario, corrección de Bonferroni)

<sup>b</sup>  $p < 0,05$ (valor de corte para medida de resultado secundario, el valor no corregido debe ser considerado con cuidado)

la memoria de reconocimiento espacial (MRE) fueron inferiores a los datos normativos (puntaje  $z$  promedio -1,05; IC del 95%: IC -1,89 a -0,23;  $p = 0,018$ ), mientras que tuvieron puntuaciones normales en las otras pruebas de memoria visual. Los pacientes tuvieron puntuaciones normales en las otras mediciones de resultados primarios (función ejecutiva) (IED) y en las medidas de resultado secundarias (tabla 3).

La tasa de recaída se analizó en los 17 pacientes con al menos 2 años de sobrevida en el seguimiento. Seis pacientes (35%) tuvieron una recaída. Dos pacientes fueron inicialmente no tratados y los anticuerpos LGI1 solo se dosaron en la recaída. En 4, las recaídas ocurrieron a pesar del tratamiento con inmunoterapia en la fase aguda. Ninguno de estos pacientes estaba bajo fármacos inmunosupresores a largo plazo cuando la recaída ocurrió. En aquellos donde se dosaron ( $n = 2$ ), los anticuerpos estaban ausentes entre los episodios y reaparecieron en la recaída. La media del tiempo desde el inicio de la enfermedad inicial a la recaída fue de 35 meses (rango 21-98 meses).

**DISCUSIÓN** Ofrecemos información clínica detallada de 38 pacientes con anticuerpos dirigidos a LGI1 y reportamos tasas de incidencia importantes y la evolución a largo plazo. Mayor información sobre el curso y la semiología de las convulsiones es esencial para mejorar el diagnóstico. Las convulsiones respondieron rápidamente a la inmunoterapia, y el seguimiento a largo plazo también mostró mejoría cognitiva. Otros resultados importantes del seguimiento a largo plazo fueron: notable amnesia persistente para el período de la enfermedad, una alta tasa de recaídas y la evolución de EMT.

La incidencia anual de encefalitis anti-LGI1 en los Países Bajos fue de 0,83 por millón, la cual está en el mismo orden de magnitud que la enfermedad de Creutzfeldt-Jakob<sup>11</sup> o el síndrome miasteniforme de Lambert-Eaton.<sup>12</sup> El aumento de la incidencia del diagnóstico de LGI1 es probablemente debido a un mejor reconocimiento de la enfermedad, pero aún sospechamos un subdiagnóstico.

El reconocimiento de las convulsiones es una pista para el diagnóstico precoz. Un total de 47% de los pacientes tenían FBDS, un síntoma precoz, comparable al 40% - 71% en otras series.<sup>13,14</sup> El reconocimiento de estas convulsiones cortas podría ser complicado por la ausencia habitual de anomalías en el EEG ictal, lo que ha sido reportado previamente.<sup>15</sup> Un total de 66% de nuestros pacientes tenían convulsiones focales con características primordialmente discognitivas o autonómicas, también de forma temprana en el curso de la enfermedad. Unos pocos casos presentados con crisis pilomotoras se han reportado

previamente.<sup>16</sup> Estos casos también apoyan nuestros resultados de que las crisis focales y las FBDS inicialmente no fueron reconocidas por los médicos tratantes, incluso neurólogos. Se debe prestar especial atención a ataques repetidos, que los pacientes describen como “sentimiento indefinible”, “pensamientos que se alejan” o características autonómicas, incluyendo “piel de gallina”. Las convulsiones tónico clónicas son más fáciles de reconocer, pero ocurren más tardíamente en el curso de la enfermedad.

Casi el 90% de los pacientes sobrevivientes tienen un buen pronóstico. Los pacientes quedaron con amnesia persistente de todo el proceso de la enfermedad y de los meses o años precedentes. Durante las entrevistas con pacientes y sus familiares, este síntoma fue muy estresante para ellos, y a menudo fue malinterpretado como una manifestación de la enfermedad en curso. La amnesia persistente del período de la enfermedad se ha reconocido previamente en las encefalitis anti-NMDAR<sup>17</sup> y se pensaba que podía ser causada por alteraciones de la potenciación a largo plazo (PLP), que es el mecanismo celular clave en el aprendizaje y la memoria.<sup>17-19</sup> Un mecanismo similar podría ser considerado en la encefalitis anti-LGI1, porque la interacción LGI1-ADAM22-AMPA se cree puede influir tanto en la depresión a largo plazo (DLP) como en la PLP.<sup>4,20</sup> Así como la DLP es esencial para la memoria espacial, la perturbación de este proceso podría ser una explicación para la desorientación espacial en la encefalitis anti-LGI1. La evaluación neuropsicológica mostró MRE alterada con rendimiento normal en otras pruebas de memoria (en nuestro limitado tamaño muestral), lo que implica un trastorno persistente de la orientación espacial, informado por los pacientes y sus familiares. La apatía también se informó con frecuencia, pero no se valoró formalmente por nuestra evaluación computarizada.

La tasa de letalidad a los 2 años fue del 19%. Otro estudio reportó, 3/57 muertes (6%) después de un seguimiento de 2 a 60 meses.<sup>2</sup> En nuestro estudio, 2/5 muertes ocurrieron en pacientes no tratados, antes de que los anticuerpos LGI1 fueran reconocidos. Suponiendo que la inmunoterapia es eficaz, un mejor reconocimiento y tratamiento de las encefalitis LGI1 se espera que disminuya la letalidad en el futuro.

Las recaídas clínicas ocurrieron con mayor frecuencia de lo anticipado. En 2 pacientes, el diagnóstico fue realizado por primera vez durante una recaída. El subdiagnóstico de pacientes con un solo episodio de la enfermedad podría dar lugar a una sobreestimación de la tasa de recaída, de forma similar a la descrita en anti-NMDAR<sup>22,23</sup> y la encefalitis anti-AMPA.<sup>24,25</sup> Informes de series anteriores reportan recaídas en el 0%-18% de los pacientes con anti-LGI1,

pero el seguimiento fue más corto, mientras que las recaídas tienden a ocurrir años después del episodio de la enfermedad inicial.<sup>2,14,26</sup>

Los pacientes con EMT tuvieron convulsiones frecuentes durante el curso de la enfermedad. La EMT podría ser causada por la actividad convulsiva o directamente por la inflamación. El desarrollo de EMT después de la encefalitis límbica se informó previamente en los pacientes con anti-LGI1.<sup>27</sup> Cambios similares en hipocampo se han reportado posterior a encefalitis anti-GAD65 o anti-NMDAR.<sup>28,29</sup>

El diagnóstico de los anticuerpos LGI1 puede ser complicado por baja sensibilidad del CBA con LCR. Solo el 53% de las muestras resultaron positivas, dando como resultado retrasos significativos en 2 pacientes hasta que el suero fue analizado. Seis de las 8 muestras de LCR negativas para CBA mostraron una típica tinción de anticuerpos LGI1 en el tejido del hipocampo de rata, lo que indica que los anticuerpos están de hecho presentes en el LCR. La necesidad de análisis en suero para detectar anticuerpos LGI1 es justo lo opuesto a las encefalitis anti-NMDAR,<sup>30</sup> anti-GABA<sub>B</sub><sup>31</sup> o la encefalitis anti-AMPA.<sup>24</sup> Esto subraya la necesidad de analizar tanto el suero como el LCR.

La media de tiempo desde el inicio hasta la recuperación fue de un año, y el tiempo hasta la recaída fue de casi 3 años. Esto resalta la necesidad de estudios a largo plazo para la evaluación del pronóstico. Para permitir la inclusión de un número considerable de pacientes, este estudio se llevó a cabo retrospectivamente, con las limitaciones asociadas. Se obtuvieron los datos más fiables analizando los archivos de los pacientes y entrevistando a pacientes, parientes y médicos tratantes. Todas las resonancias magnéticas fueron revisadas ciegamente por un neurorradiólogo especializado. Sin embargo, protocolos de exploración variable y la falta de imágenes coronales en algunos pacientes limitó su análisis.

Reconocer el síndrome clínico claramente definido de la encefalitis anti-LGI1 es esencial para su tratamiento precoz. El curso de la enfermedad puede ser relativamente lento, parecido a la demencia, y se debe prestar atención a las convulsiones con manifestaciones sutiles en el curso temprano de la enfermedad. El pronóstico a largo plazo de los pacientes sobrevivientes es mayormente favorable, aunque la amnesia persistente del período de enfermedad es preocupante para los pacientes. Las recaídas son comunes y los médicos deben ser conscientes de que estas pueden ocurrir hasta años después del episodio inicial de la enfermedad.

#### CONTRIBUCIONES DE AUTOR

A. van Sonderen: diseño del estudio, adquisición de datos, análisis de datos, escritura. R.D. Thijs: diseño del estudio, adquisición de datos, análisis de datos, revisión del contenido del manuscrito. E.C. Coenders: diseño del estudio, adquisición de datos, análisis de datos. L.C. Jiskoot: diseño

del estudio, adquisición de datos, revisión del contenido del manuscrito. E. Sánchez: análisis de datos, revisión del contenido del manuscrito. M.A.A.M. de Bruijn: revisión del contenido del manuscrito. M.H. Van Coevorden-Hameete: adquisición de datos, revisión del contenido del manuscrito. P.W. Wirtz: revisión del contenido del manuscrito. M.W.J. Schreurs: revisión del contenido del manuscrito. P.A.E. Sillevius Smitt: revisión del contenido del manuscrito. M.J. Titulaer: Diseño del estudio, adquisición de datos, análisis de datos, escritura médica.

#### AGRADECIMIENTOS

Los autores agradecen a los pacientes por su participación, todos los médicos referentes, y Mariska Nagtzaam, Sanae Boukhrissi y Esther Hulsenboom por la asistencia técnica.

#### FINANCIAMIENTO DEL ESTUDIO

M.T fue apoyado por una beca ErasmusMC y ha recibido financiación de la Organización Holandesa para la Investigación Científica (NWO, incentivo de Veni) y de las fundaciones holandesas de la epilepsia (NEF, proyecto 14-19).

#### CONFLICTOS DE INTERESES

A. van Sonderen, R. Thijs, E. Coenders, L. Jiskoot, E. Sánchez, M. de Bruijn, M. van Coevorden-Hameete, P. Wirtz y M. Schreurs declaran no presentar conflictos de intereses relevantes para el manuscrito. P. Smitt posee una patente para la detección de anti-DNER y recibió apoyo de investigación de Euroimmun. M. Titulaer recibió fondos de investigación para servir en un asesoramiento científico Consejo de Medimmune LLC y una beca de viaje para conferencias en la India De SunPharma, India. Los otros autores no informan sobre conflictos de intereses considerados relevantes para el manuscrito. Ir a Neurology.org para obtener información completa.

Recibido el 31 de diciembre de 2015. Aceptado en forma final 9 de mayo de 2016.

#### BIBLIOGRAFÍA

1. Irani SR, Alexander S, Waters P, et al. Antibodies to Kv1 potassium channel-complex proteins leucine-rich, glioma inactivated 1 protein and contactin-associated protein-2 in limbic encephalitis, Morvan's syndrome and acquired neuromyotonia. *Brain* 2010;133:2734–2748.
2. Lai M, Huijbers MG, Lancaster E, et al. Investigation of LGI1 as the antigen in limbic encephalitis previously attributed to potassium channels: a case series. *Lancet Neurol* 2010;9:776–785.
3. Fukata Y, Lovero KL, Iwanaga T, et al. Disruption of LGI1-linked synaptic complex causes abnormal synaptic transmission and epilepsy. *Proc Natl Acad Sci USA* 2010;107:3799–3804.
4. Ohkawa T, Fukata Y, Yamasaki M, et al. Autoantibodies to epilepsy-related LGI1 in limbic encephalitis neutralize LGI1-ADAM22 interaction and reduce synaptic AMPA receptors. *J Neurosci* 2013;33:18161–18174.
5. Kalachikov S, Evgrafov O, Ross B, et al. Mutations



- in LGII cause autosomal-dominant partial epilepsy with auditory features. *Nat Genet* 2002;30:335–341.
6. Morante-Redolat JM, Gorostidi-Pagola A, Piquer-Sirerol S, et al. Mutations in the LGII/Epitempin gene on 10q24 cause autosomal dominant lateral temporal epilepsy. *Hum Mol Genet* 2002;11:1119–1128.
  7. Irani SR, Michell AW, Lang B, et al. Faciobrachial dystonic seizures precede Lgi1 antibody limbic encephalitis. *Ann Neurol* 2011;69:892–900.
  8. Van Sonderen A, Schreurs MWJ, de Bruijn MA, et al. The relevance of VGKC positivity in the absence of LGII and Caspr2 antibodies. *Neurology* 2016;86:1692–1699.
  9. Irani SR, Stagg CJ, Schott JM, et al. Faciobrachial dystonic seizures: the influence of immunotherapy on seizure control and prevention of cognitive impairment in a broadening phenotype. *Brain* 2013;136:3151–3162.
  10. Graus F, Delattre JY, Antoine JC, et al. Recommended diagnostic criteria for paraneoplastic neurological syndromes. *J Neurol Neurosurg Psychiatry* 2004;75:1135–1140.
  11. Jansen C, Parchi P, Capellari S, et al. Human prion diseases in the Netherlands (1998–2009): clinical, genetic and molecular aspects. *PLoS One* 2012;7:e36333.
  12. Titulaer MJ, Lang B, Verschuuren JJ. Lambert-Eaton myasthenic syndrome: from clinical characteristics to therapeutic strategies. *Lancet Neurol* 2011;10:1098–1107.
  13. Shin YW, Lee ST, Shin JW, et al. VGKC-complex/LGII-antibody encephalitis: clinical manifestations and response to immunotherapy. *J Neuroimmunol* 2013;265:75–81.
  14. Irani SR, Gelfand JM, Bettcher BM, Singhal NS, Geschwind MD. Effect of rituximab in patients with leucine-rich, glioma-inactivated 1 antibody-associated encephalopathy. *JAMA Neurol* 2014;71:896–900.
  15. Andrade DM, Tai P, Dalmau J, Wennberg R. Tonic seizures: a diagnostic clue of anti-LGII encephalitis? *Neurology* 2011;76:1355–1357.
  16. Rocamora R, Becerra JL, Fossas P, et al. Prolonged seizures: an autonomic semiology of limbic encephalitis? *Seizure* 2014;23:670–673.
  17. Dalmau J, Gleichman AJ, Hughes EG, et al. Anti-NMDA receptor encephalitis: case series and analysis of the effects of antibodies. *Lancet Neurol* 2008;7:1091–1098.
  18. van Coevorden-Hameete MH, de GE, Titulaer MJ, Hoogenraad CC, Sillevs Smitt PA. Molecular and cellular mechanisms underlying anti-neuronal antibody mediated disorders of the central nervous system. *Autoimmun Rev* 2014;13:299–312.
  19. Lau CG, Zukin RS. NMDA receptor trafficking in synaptic plasticity and neuropsychiatric disorders. *Nat Rev Neurosci* 2007;8:413–426.
  20. Huganir RL, Nicoll RA. AMPARs and synaptic plasticity: the last 25 years. *Neuron* 2013;80:704–717.
  21. Collingridge GL, Peineau S, Howland JG, Wang YT. Long-term depression in the CNS. *Nat Rev Neurosci* 2010;11:459–473.
  22. Gabilondo I, Saiz A, Galan L, et al. Analysis of relapses in anti-NMDAR encephalitis. *Neurology* 2011;77:996–999.
  23. Titulaer MJ, McCracken L, Gabilondo I, et al. Treatment and prognostic factors for long-term outcome in patients with anti-NMDA receptor encephalitis: an observational cohort study. *Lancet Neurol* 2013;12:157–165.
  24. Hoftberger R, van Sonderen A, Leyboldt F, et al. Encephalitis and AMPA receptor antibodies: novel findings in a case series of 22 patients. *Neurology* 2015;84:2403–2412.
  25. Lai M, Hughes EG, Peng X, et al. AMPA receptor antibodies in limbic encephalitis alter synaptic receptor location. *Ann Neurol* 2009;65:424–434.
  26. Malter MP, Frisch C, Schoene-Bake JC, et al. Outcome of limbic encephalitis with VGKC-complex antibodies: relation to antigenic specificity. *J Neurol* 2014;261:1695–1705.
  27. Kotsenas AL, Watson RE, Pittock SJ, et al. MRI findings in autoimmune voltage-gated potassium channel complex encephalitis with seizures: one potential etiology for mesial temporal sclerosis. *AJNR Am J Neuroradiol* 2014;35:84–89.
  28. Malter MP, Helmstaedter C, Urbach H, Vincent A, Bien CG. Antibodies to glutamic acid decarboxylase define a form of limbic encephalitis. *Ann Neurol* 2010;67:470–478.
  29. Finke C, Kopp UA, Pajkert A, et al. Structural hippocampal damage following anti-N-methyl-D-aspartate receptor encephalitis. *Biol Psychiatry* 2015;79:727–734.
  30. Gresa-Arribas N, Titulaer MJ, Torrents A, et al. Antibody titres at diagnosis and during follow-up of anti-NMDA receptor encephalitis: a retrospective study. *Lancet Neurol* 2014;13:167–177.
  31. Hoftberger R, Titulaer MJ, Sabater L, et al. Encephalitis and GABAB receptor antibodies: novel findings in a new case series of 20 patients. *Neurology* 2013;81:1500–1506.
